# Supplementary material
Source: Springer Nature journal article supplement (https://www.springermedizin.de/resource/supplementary/13012_2013_672_MOESM5_ESM.pdf/9630488)

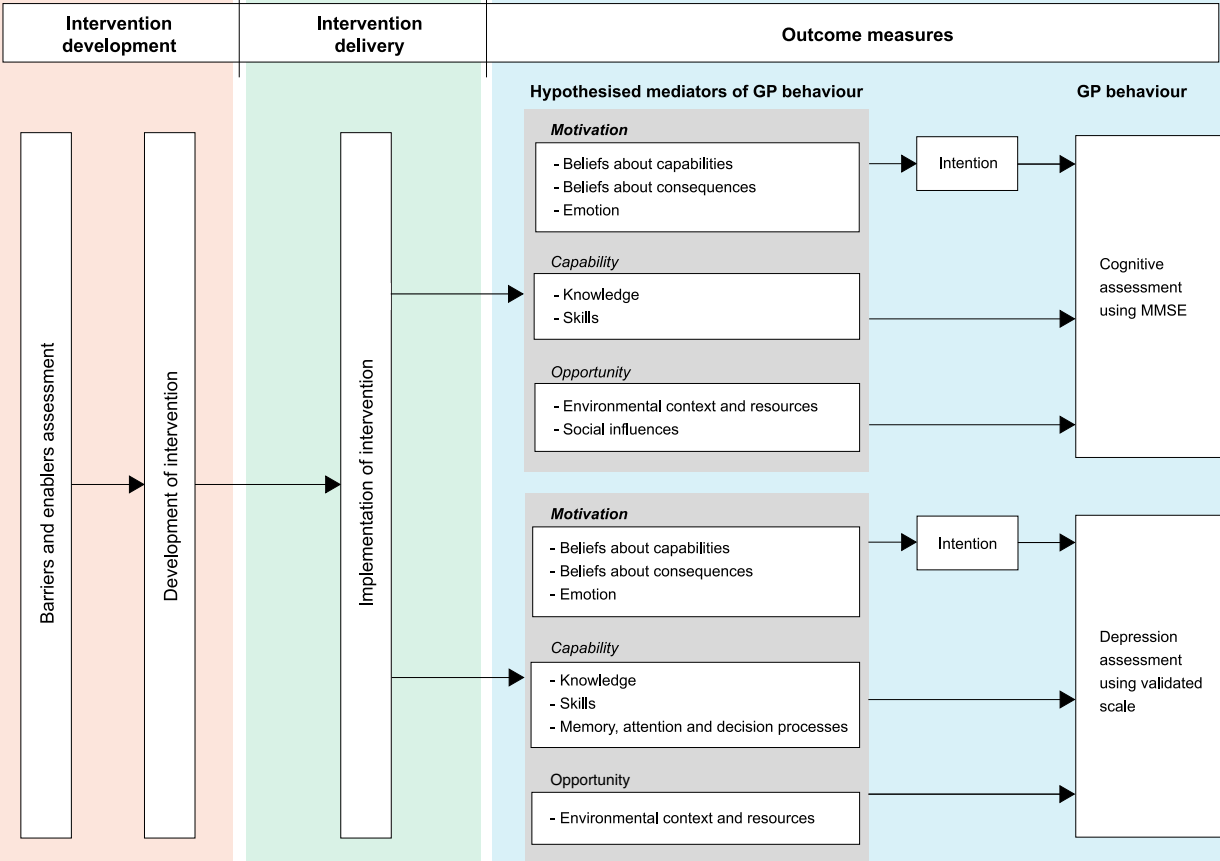

Supplement: MOESM5 [file 9630488]
